# Supplementary material for: P- or S-Doped graphdiyne as a superior metal-free electrocatalyst for the hydrogen evolution reaction: a computational study
Source: Royal Society of Chemistry journal article supplement (doi:10.1039/d1nj00652e), 2021-01-01
Supplement: d1nj00652e1.pdf [file d1nj00652e1.pdf]

## Supporting Information

### **P- or S-Doped Graphdiyne as a Superior *Metal-Free* Electrocatalyst for Hydrogen Evolution Reaction: A Computational Study**

*Siyao Wang,<sup>a</sup> Dongxu Jiao,<sup>a</sup> Jingwei Liu,<sup>a,\*</sup> Jingxiang Zhao<sup>a,\*</sup> Yongchen Shang,<sup>a</sup>*

*<sup>a</sup> College of Chemistry and Chemical Engineering, and Key Laboratory of Photonic and Electronic Bandgap Materials, Ministry of Education, Harbin Normal University,*

*Harbin, 150025, China*

*\* To whom correspondence should be addressed. Email: [xjz\\_hmily@163.com](mailto:xjz_hmily@163.com) or [zhaojingxiang@hrbnu.edu.cn](mailto:zhaojingxiang@hrbnu.edu.cn) (JZ) ; Siyao Wang and Dongxu Jiao contributed equally.*

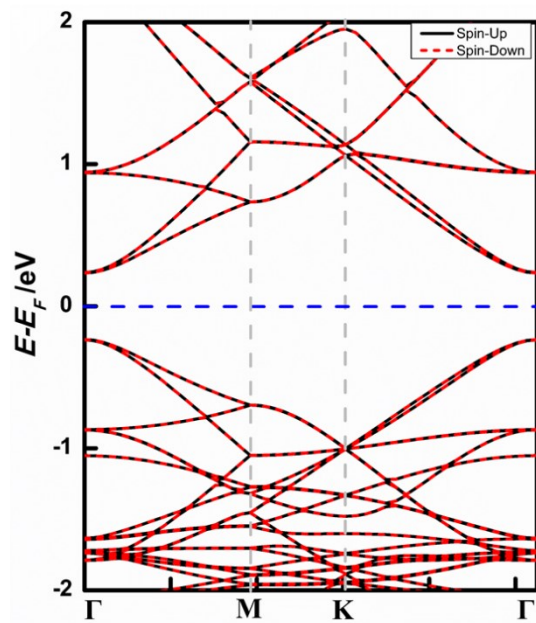

**Fig. S1.** The computed band structure of pristine graphyne. The Fermi level was set to zero in blue dashed line.

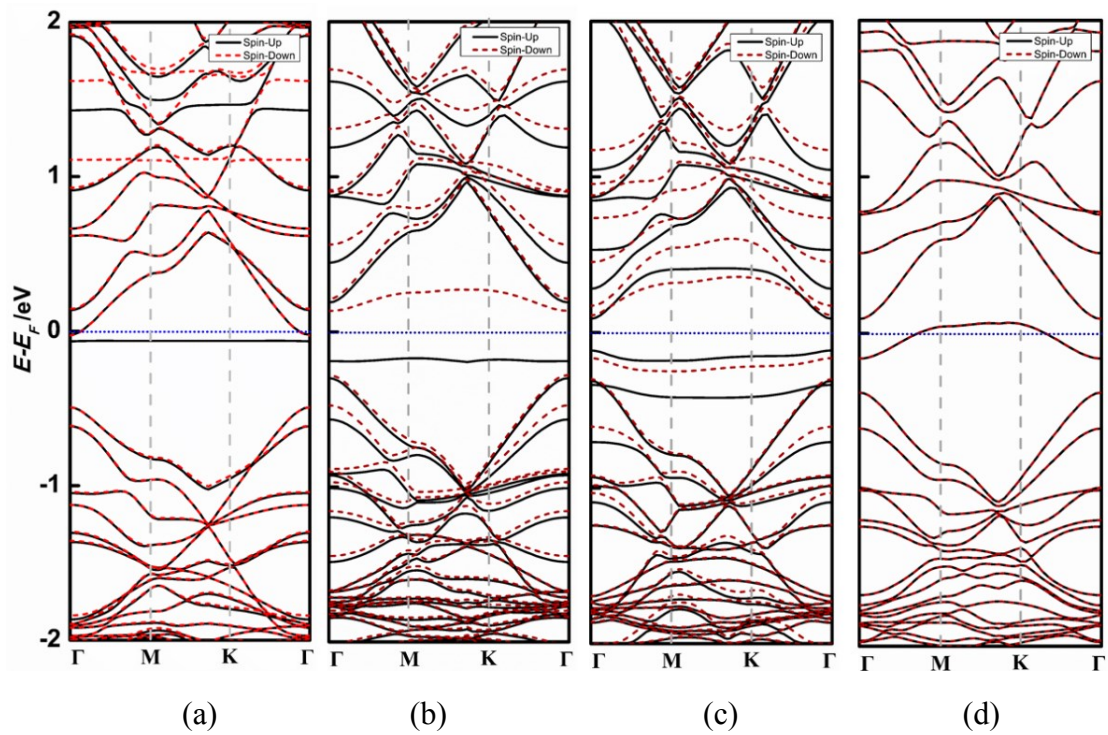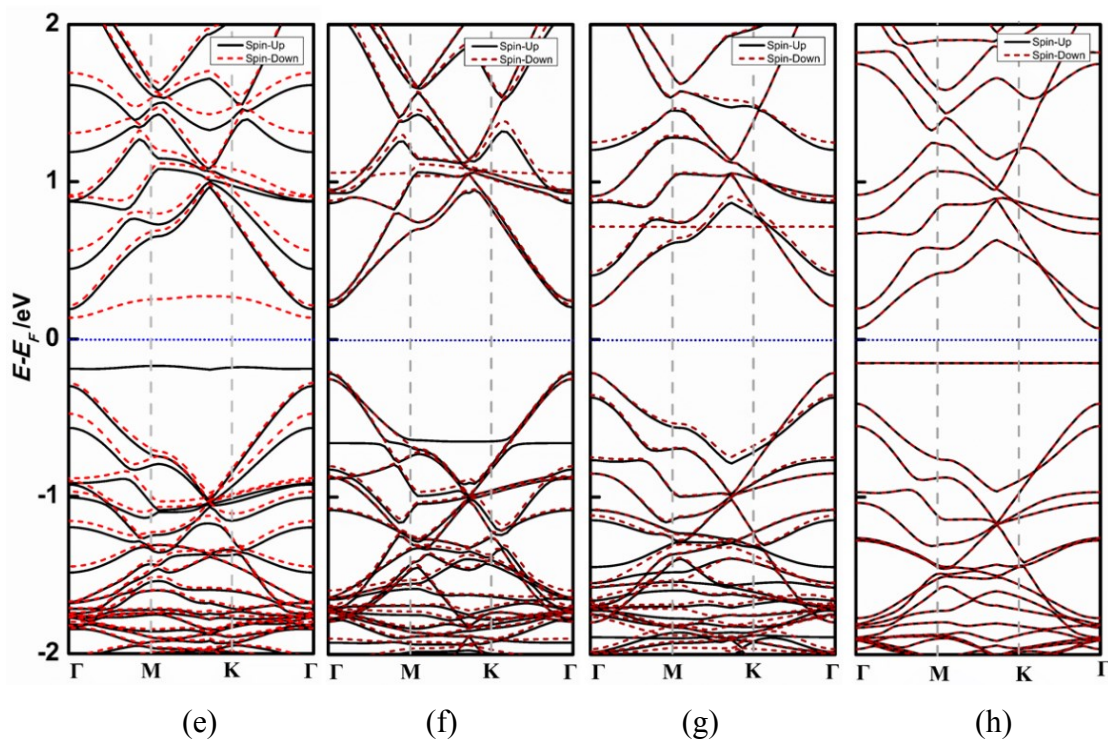

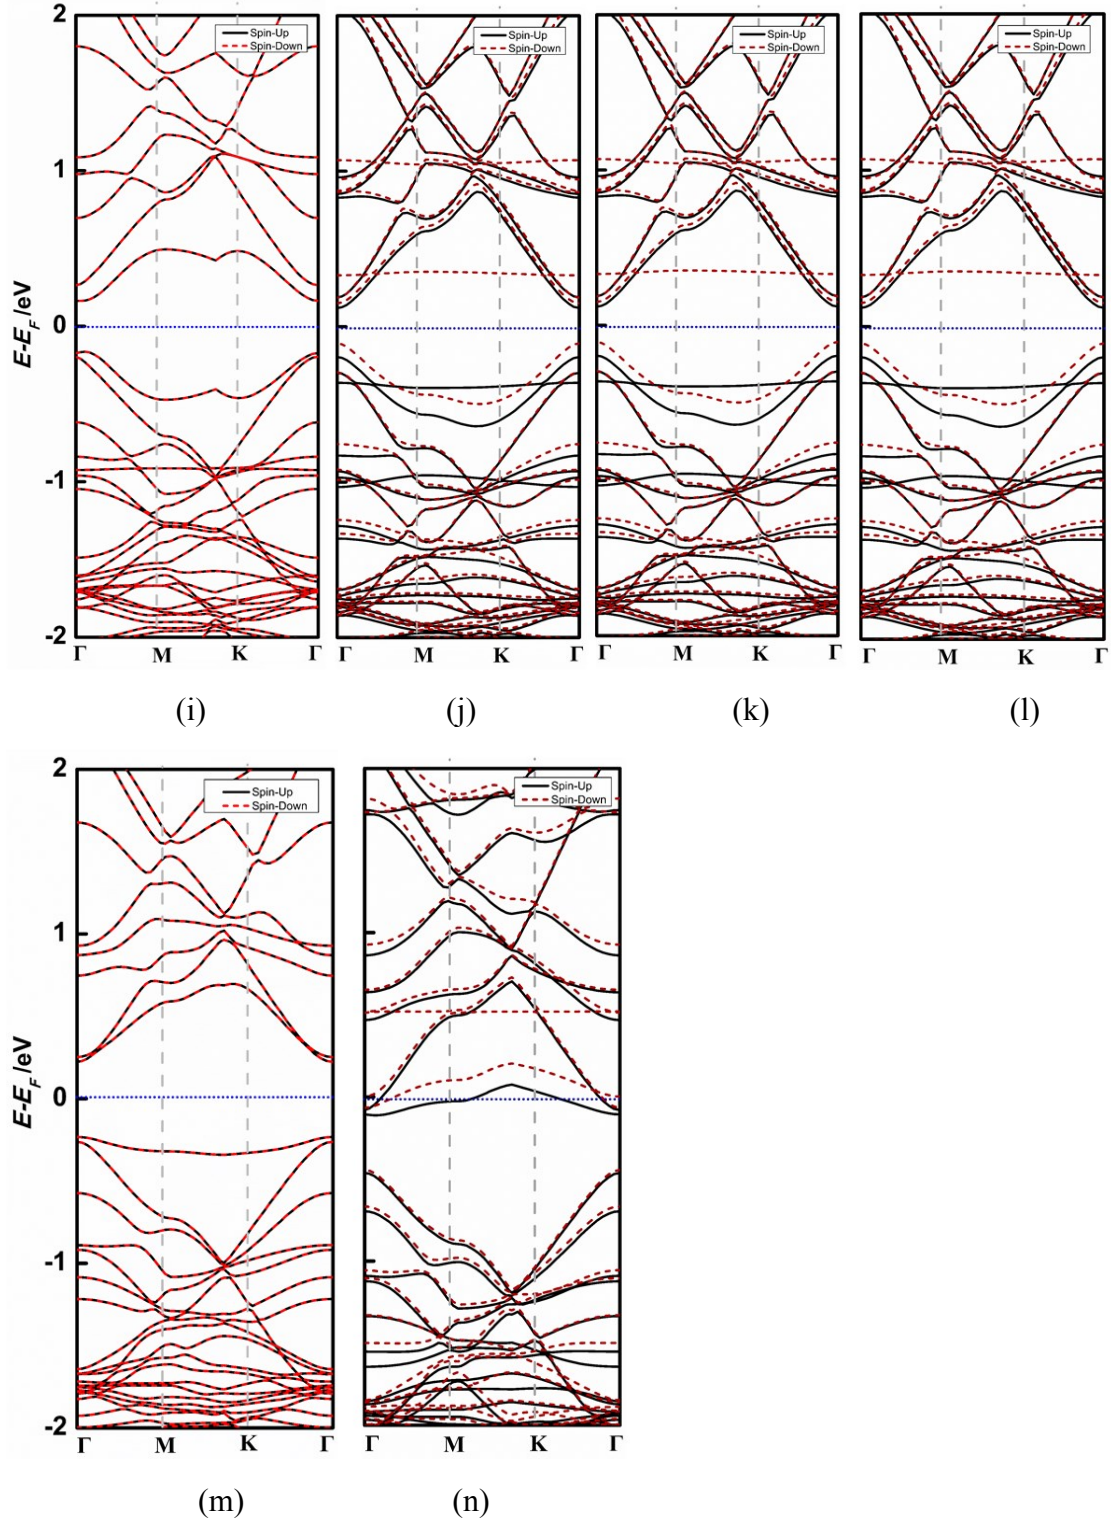

**Fig. S2.** The obtained band structures of doped GDY systems with (a)  $I_{P1}$ , (b)  $I_{P2}$ , (c)  $I_{P3}$ , (d)  $S_{P1}$ , (e)  $S_{P2}$ , (f)  $S_{P3}$ , (g)  $S_{P4}$ , (h)  $I_{S1}$ , (i)  $I_{S2}$ , (j)  $I_{S3}$ , (k)  $S_{S1}$ , (l)  $S_{S2}$ , (m)  $S_{S3}$ , and (n)  $S_{S4}$ . The Fermi level was set to zero in blue dotted line.

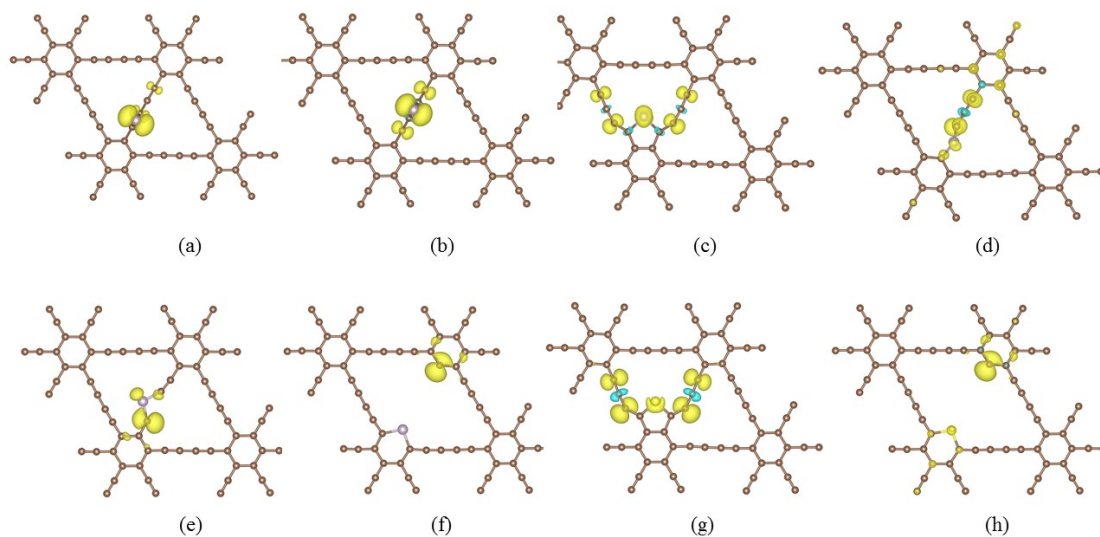

**Fig. S3.** The computed isosurfaces of spin density for (a)  $I_{P1}$ , (b)  $I_{P2}$ , (c)  $I_{P3}$ , (d)  $S_{P2}$ , (e)  $S_{P3}$ , (f)  $S_{P4}$ , (g)  $I_{S3}$ , and (h)  $S_{S4}$ .

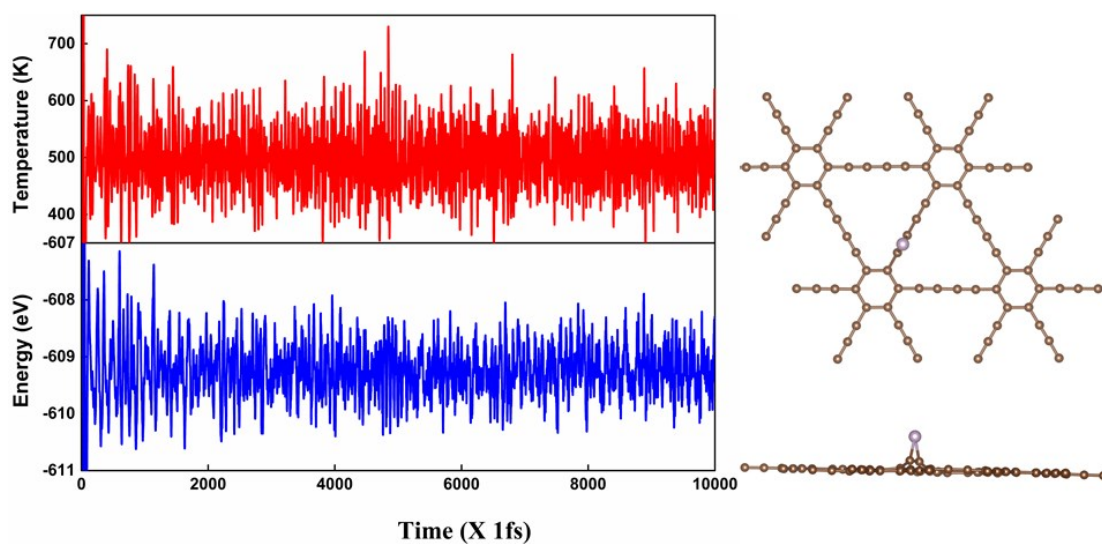

(a)

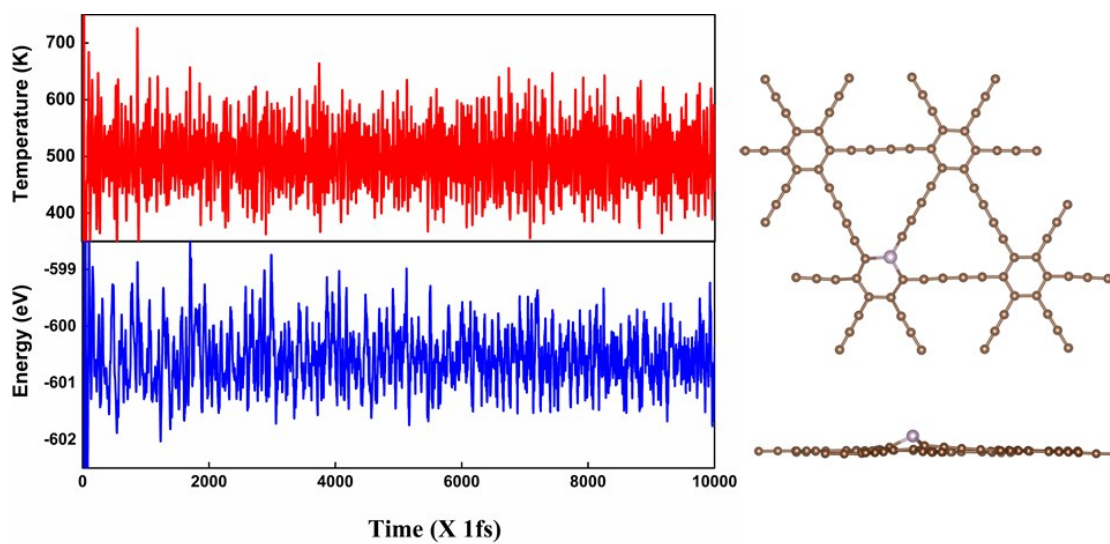

(b)

**Fig. S4.** Variations of temperature and energy versus the time for AIMD simulations under 500 K for 10 ps with a time step of 1 fs and the corresponding schematic diagrams of the atomic configurations after dynamics simulation (top and side views) for (a)  $I_{P1}$  and (b)  $S_{P1}$ .

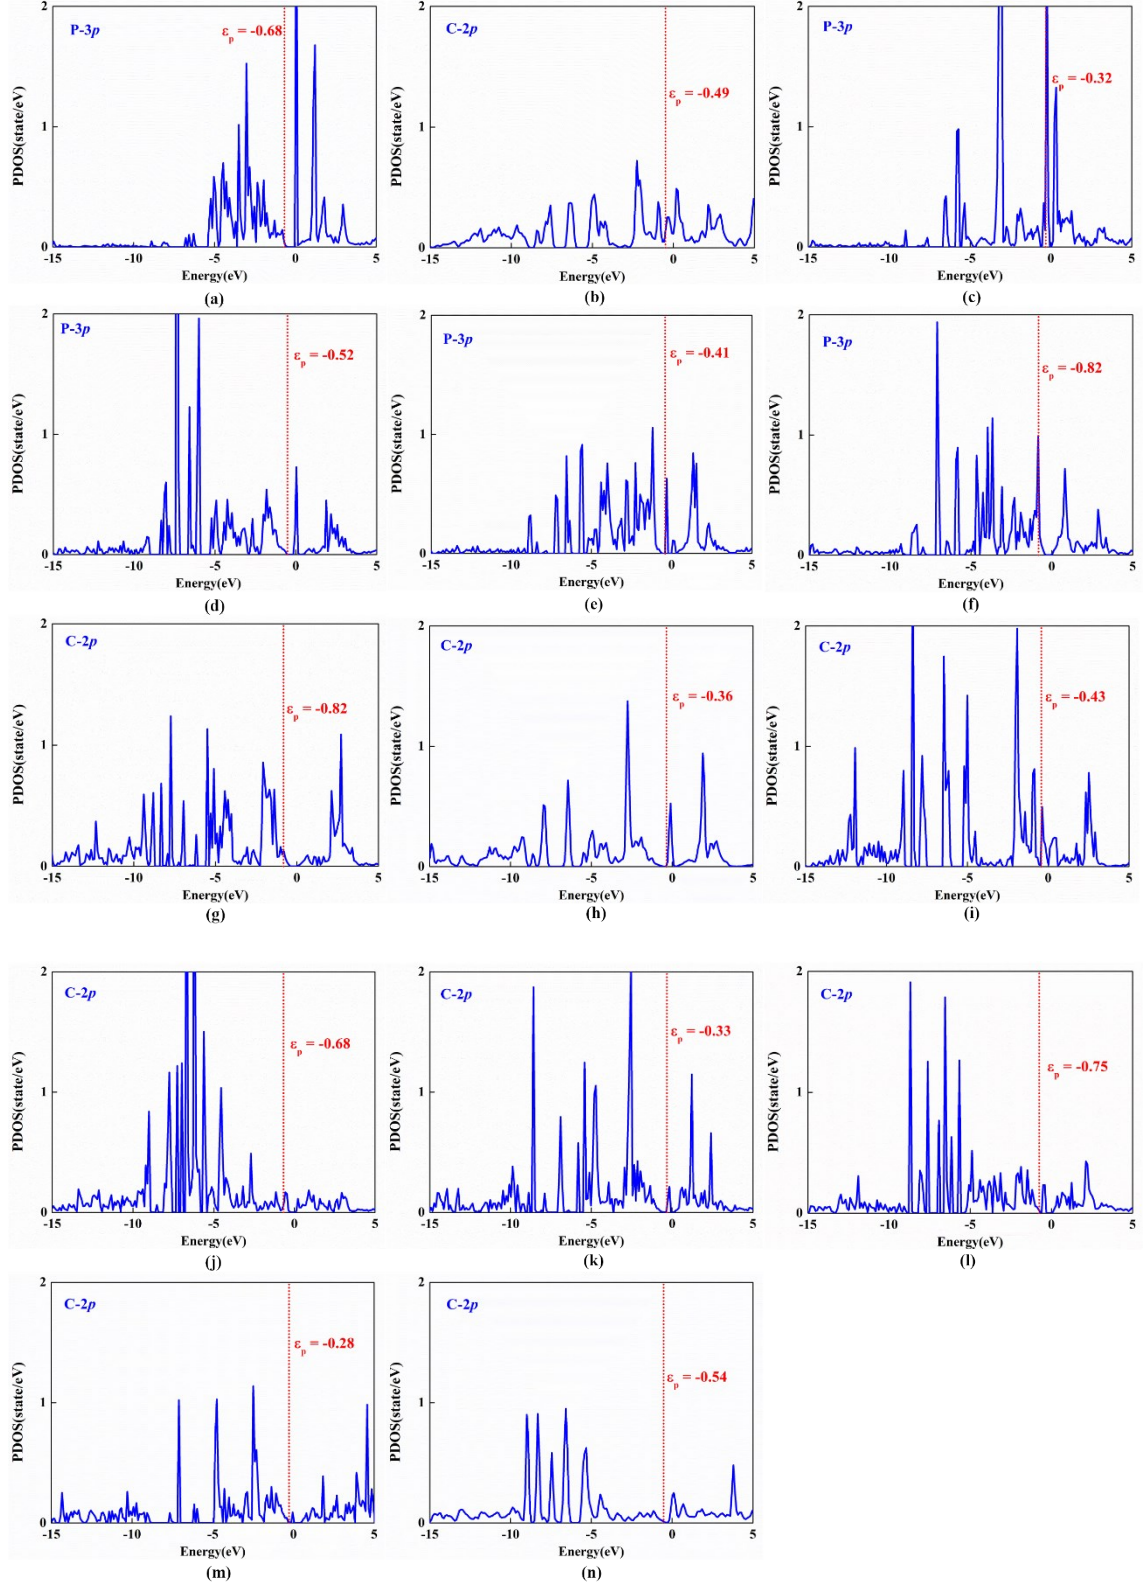

**Fig. S5.** The computed p-projected density of states of (a)  $I_{p1}$ , (b)  $I_{p2}$ , (c)  $I_{p3}$ , (d)  $S_{p1}$ , (e)  $S_{p2}$ , (f)  $S_{p3}$ , (g)  $S_{p4}$ , (h)  $I_{s1}$ , (i)  $I_{s2}$ , (j)  $I_{s3}$ , (k)  $S_{s1}$ , (l)  $S_{s2}$ , (m)  $S_{s3}$ , and (n)  $S_{s4}$ . The Fermi level was set to zero in red dotted line.
